# Supplementary material for: A Single Origin for Nymphalid Butterfly Eyespots Followed by Widespread Loss of Associated Gene Expression
Source: PubMed Central journal article supplement (PMC3420954; doi:10.1371/journal.pgen.1002893), 2012-08-16

**Figure S2. Gene expression profiles of 21 nymphalid species and 3 outgroup species.** Gene expression in larval wing discs of (A) *Tithorea tarricina* hindwings, (B) *Danaus plexippus* forewings, (C) *Morpho peleides* forewings, (D) *Caligo memnon* forewings, (E) *Bicyclus anynana* hindwings, (F) *Consul fabius* hindwings, (G) *Hypna clytemenstra* forewing, (H) *Dryadula phaetusa* hindwings, (I) *Hamadryas amphinome* hindwings, (J) *Hamadryas februa* hindwings, (K) *Catonephele numilia* hindwings, (L) *Nessaea aglaura* hindwings, (M) *Myscelia cyaniris* hindwings, (N) *Vanessa virginiensis* forewings, (O) *Vanessa cardui* forewings, (P) *Polygonia interrogationis* hindwings, (Q) *Colobura dirce* hindwings, (R) *Siproeta stelenes* hindwings, (S) *Anartia fatima* hindwings, (T) *Chlosyne janais* hindwings, (U) *Junonia coenia* forewings, and outgroups (V) *Lycaena phlaeas* (Lycaenidae) forewings, (W) *Pieris rapae* (Pieridae) forewings, (X) *Papilio anchisiades* (Papilionidae) hindwings. Expression in eyespot centers is indicated by plus signs ('+'), while genes which displayed no elevated expression in future eyespot centers are indicated by minus signs ('-'). Numbers indicate sample size.

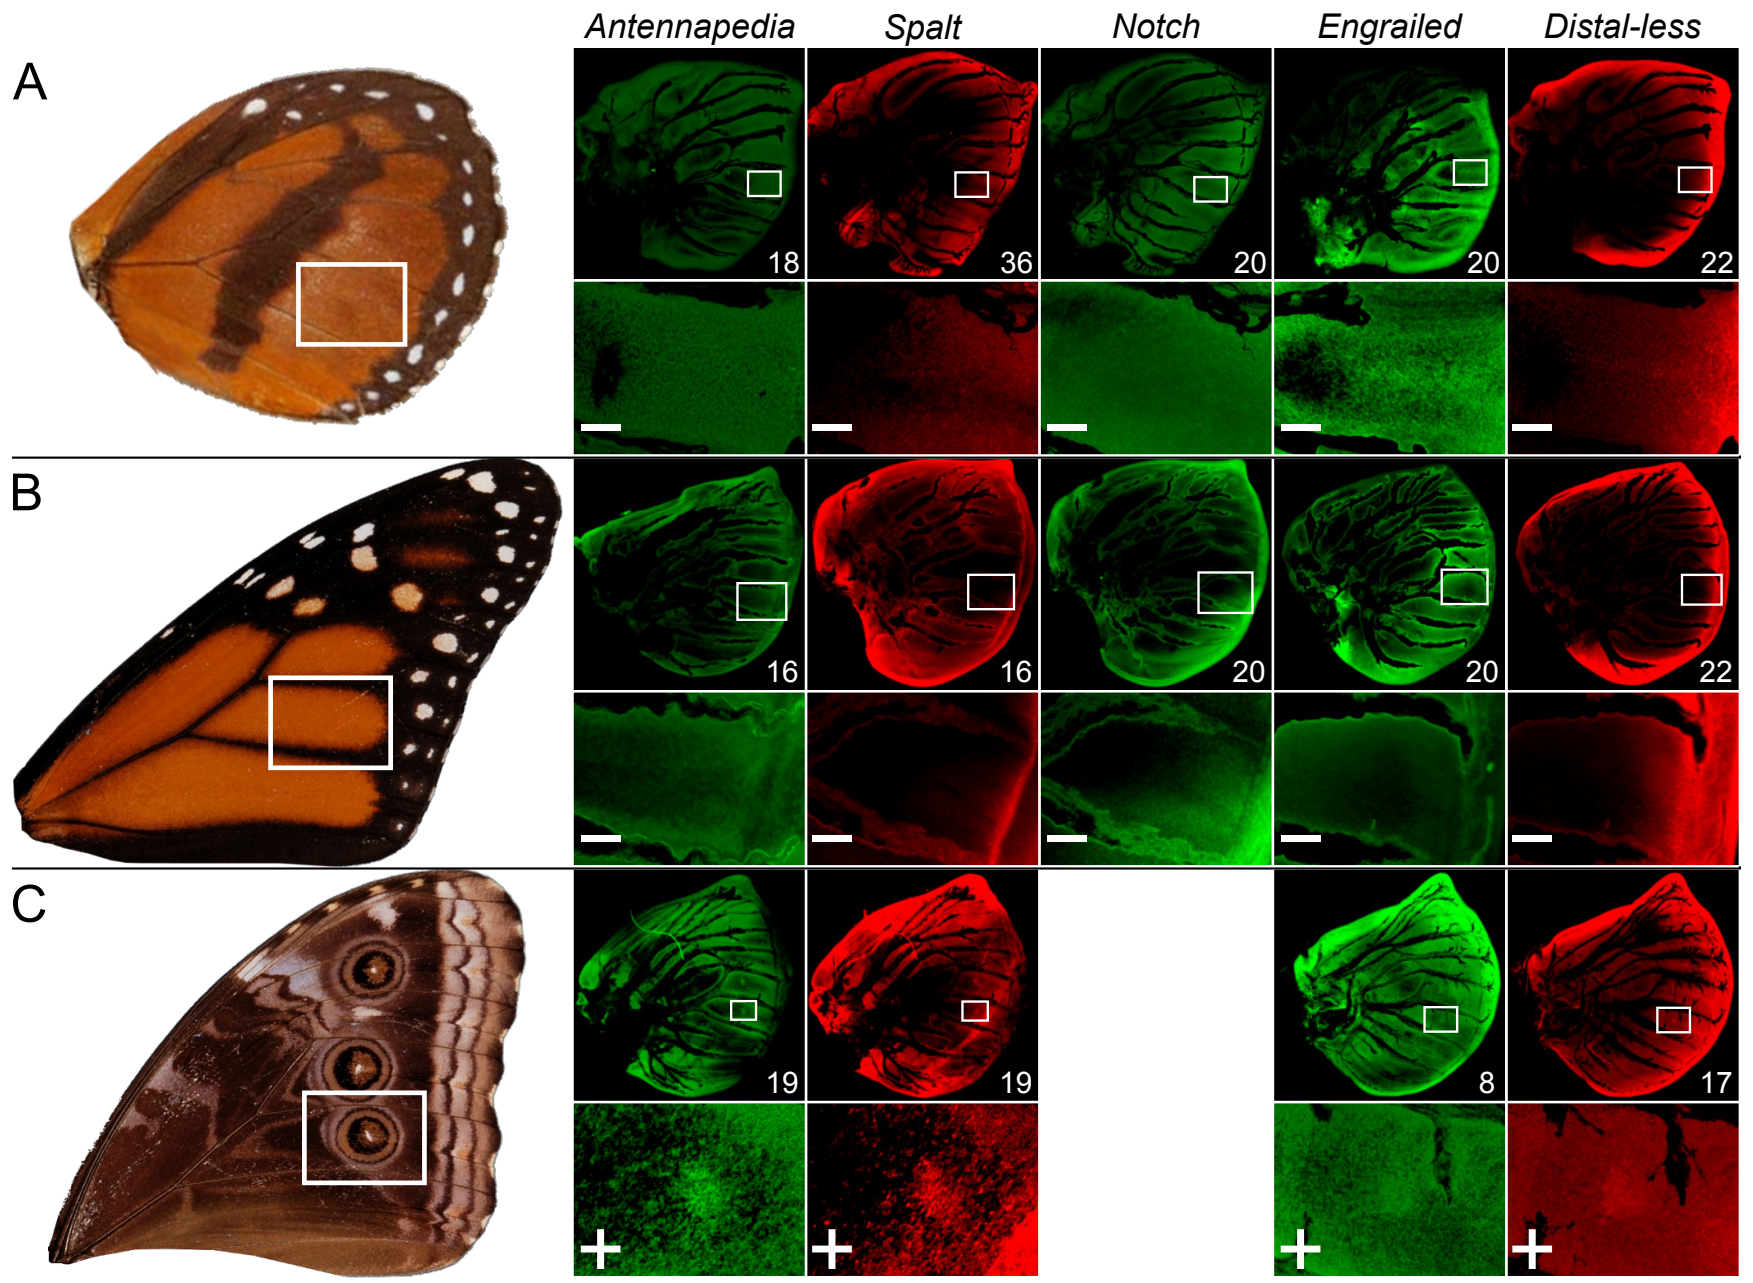

D

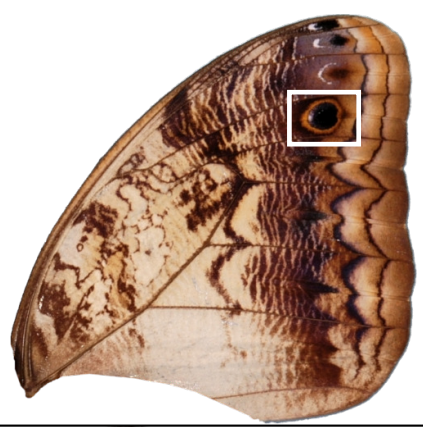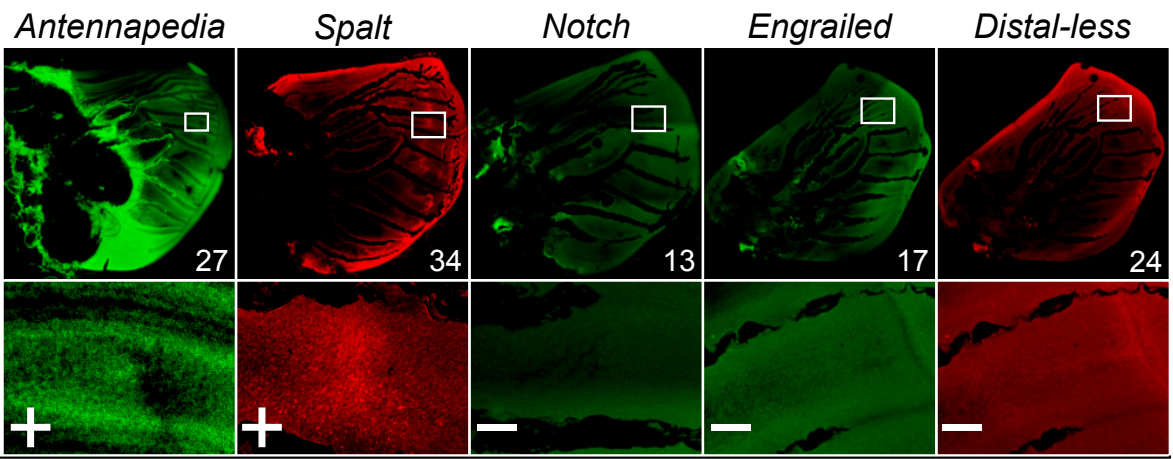

E

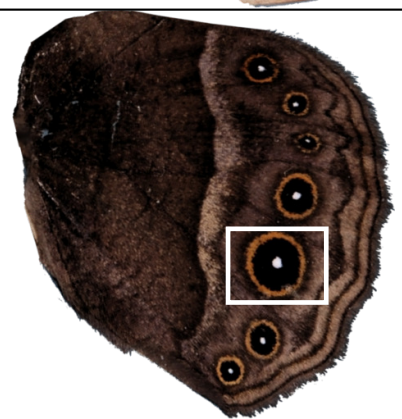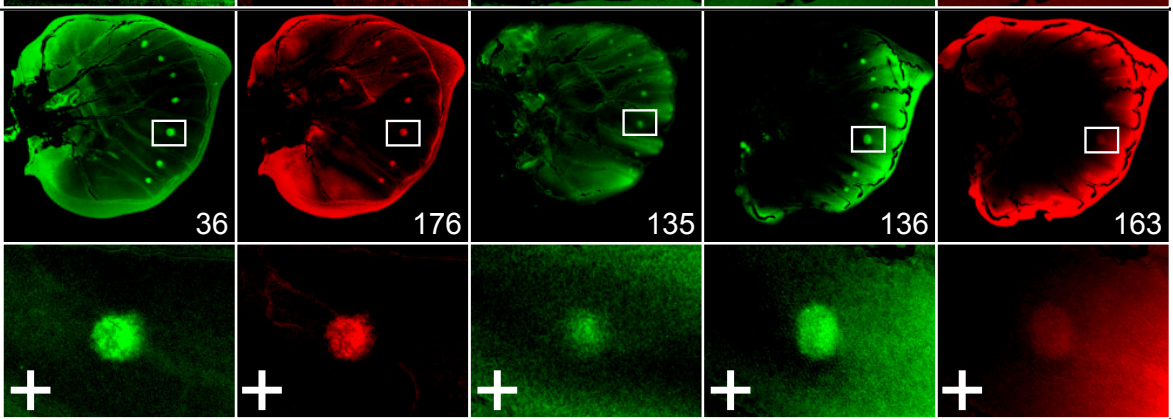

F

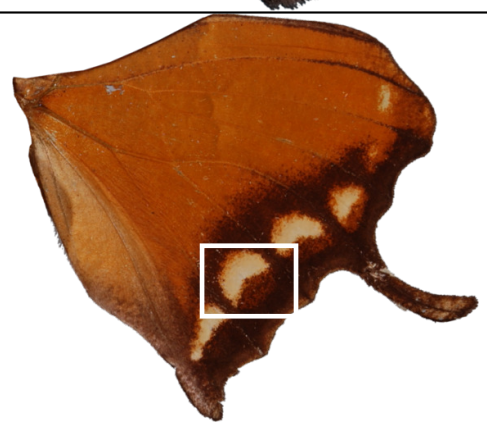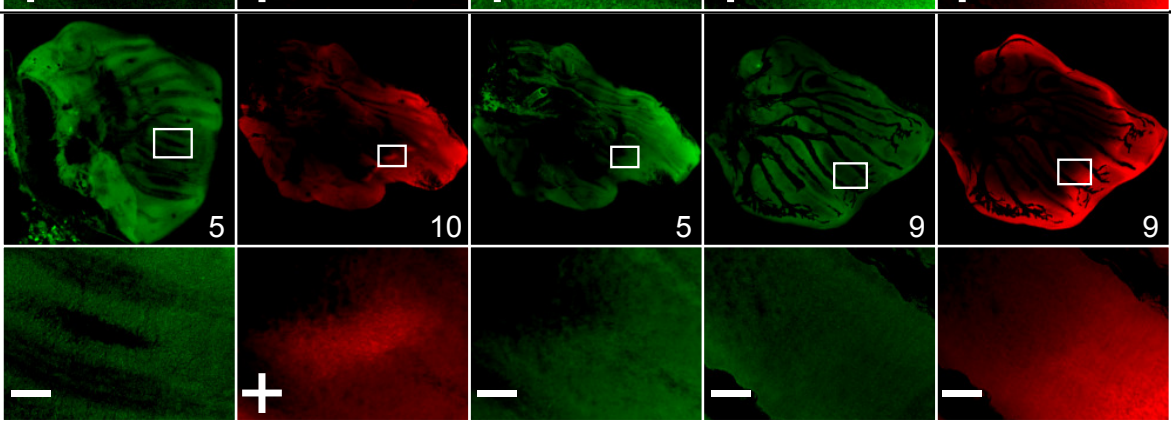

**G**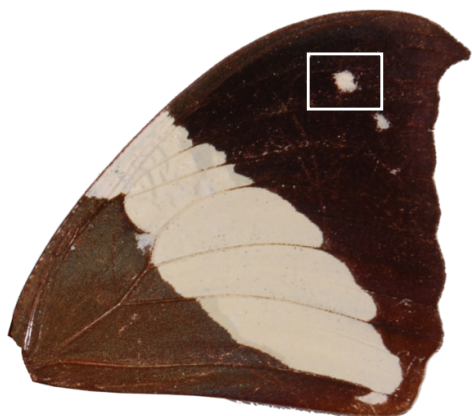*Antennapedia**Spalt**Notch**Engrailed**Distal-less*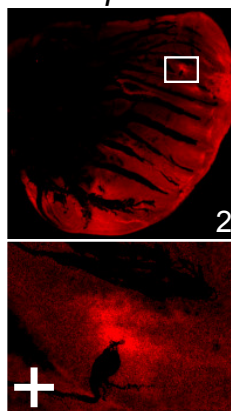**H**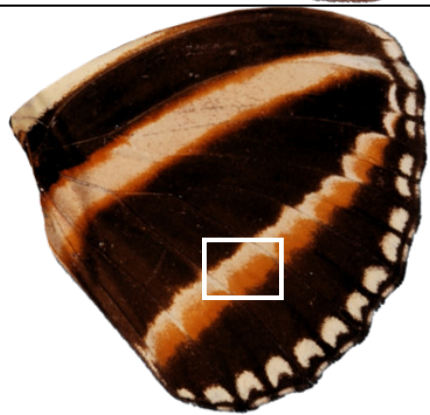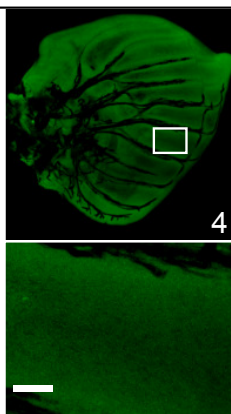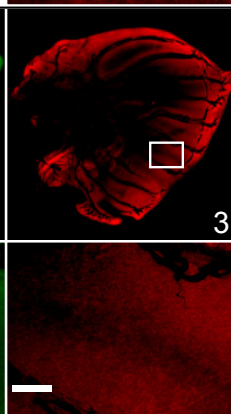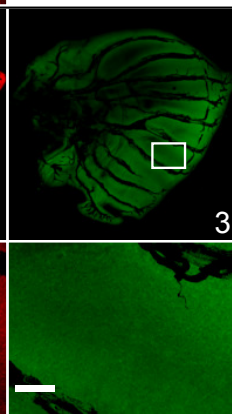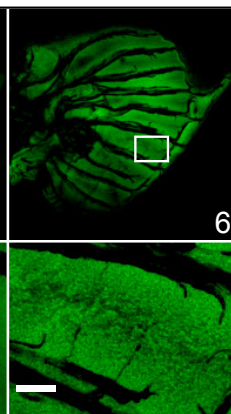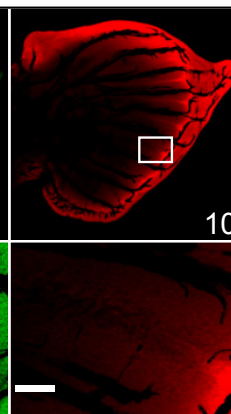**I**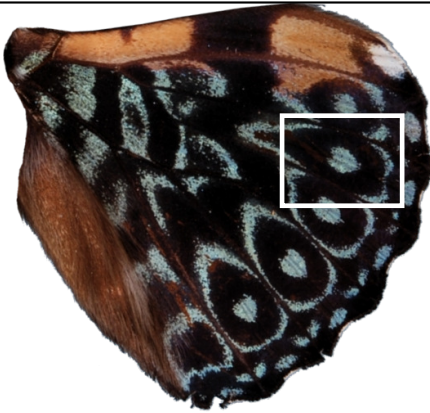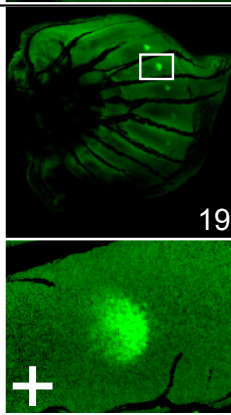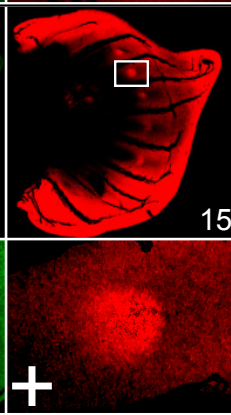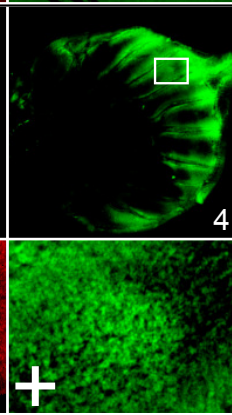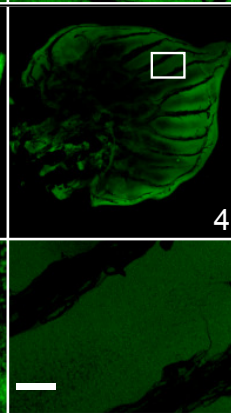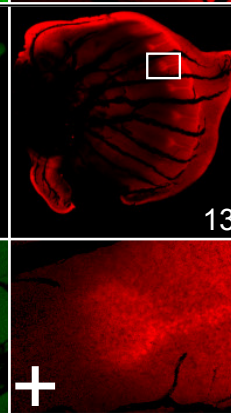

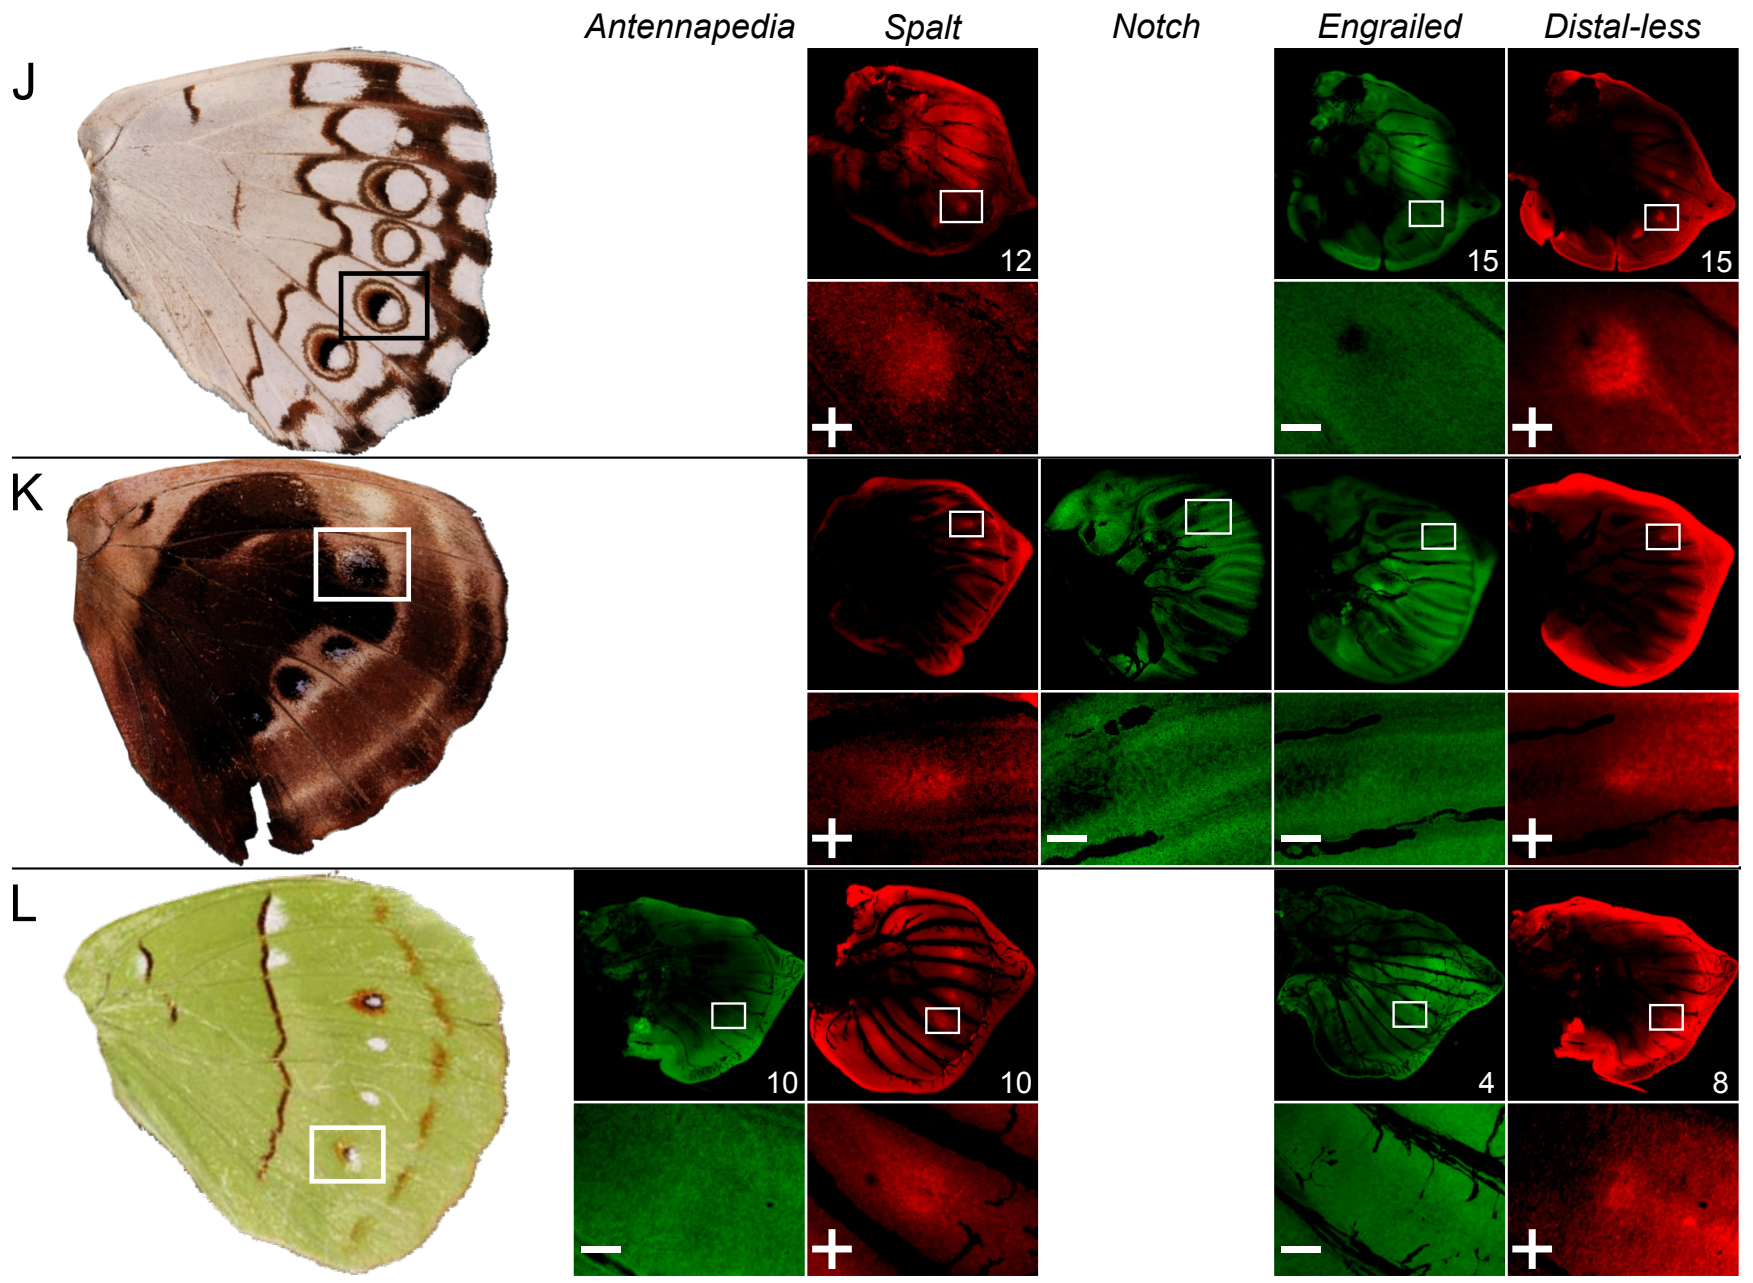

M

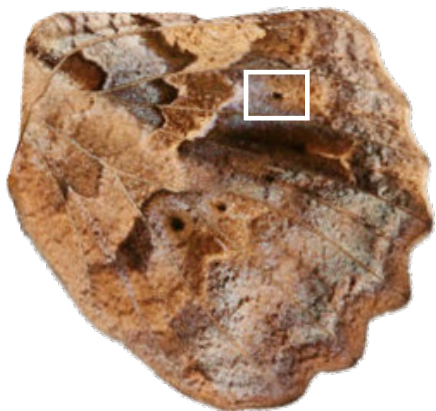

*Antennapedia*

*Spalt*

*Notch*

*Engrailed*

*Distal-less*

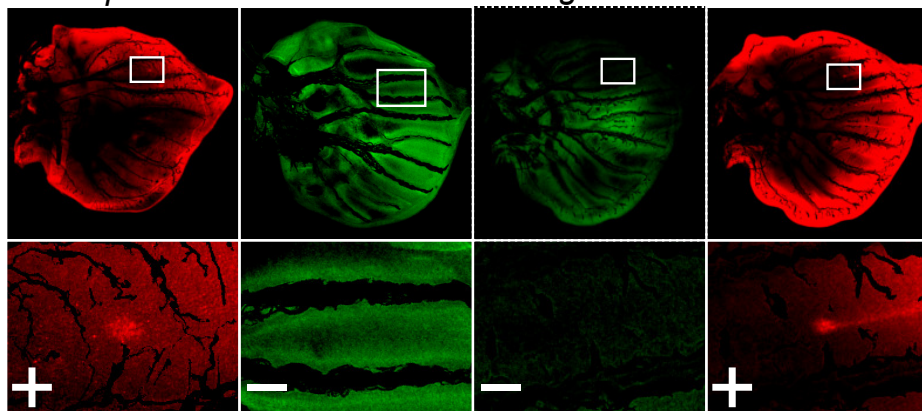

N

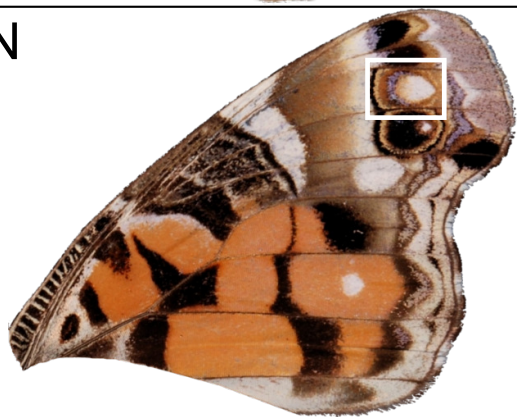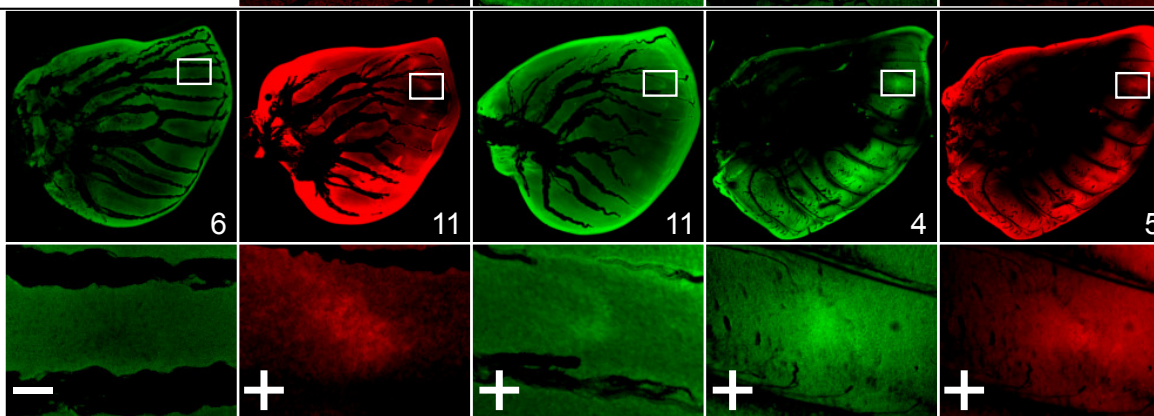

O

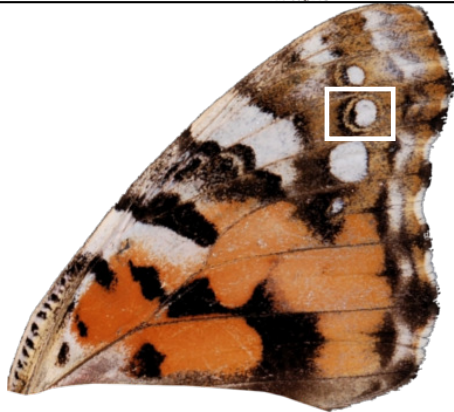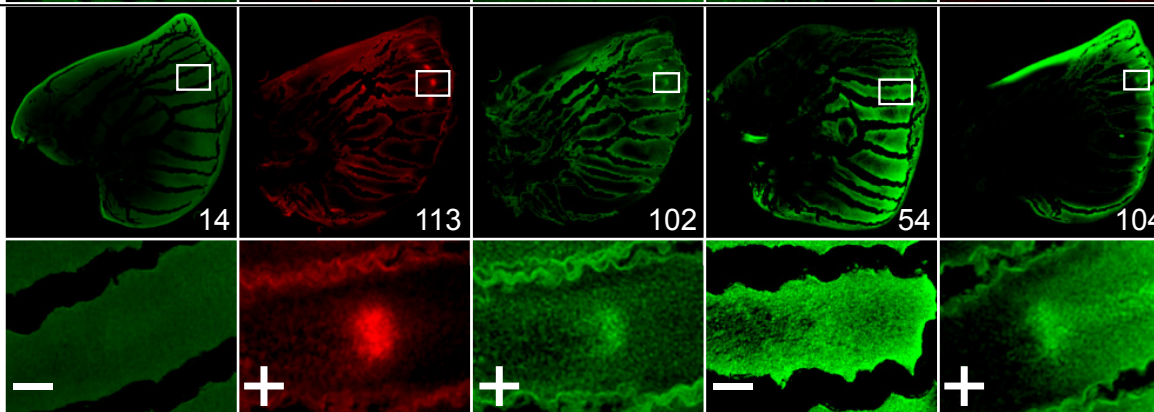

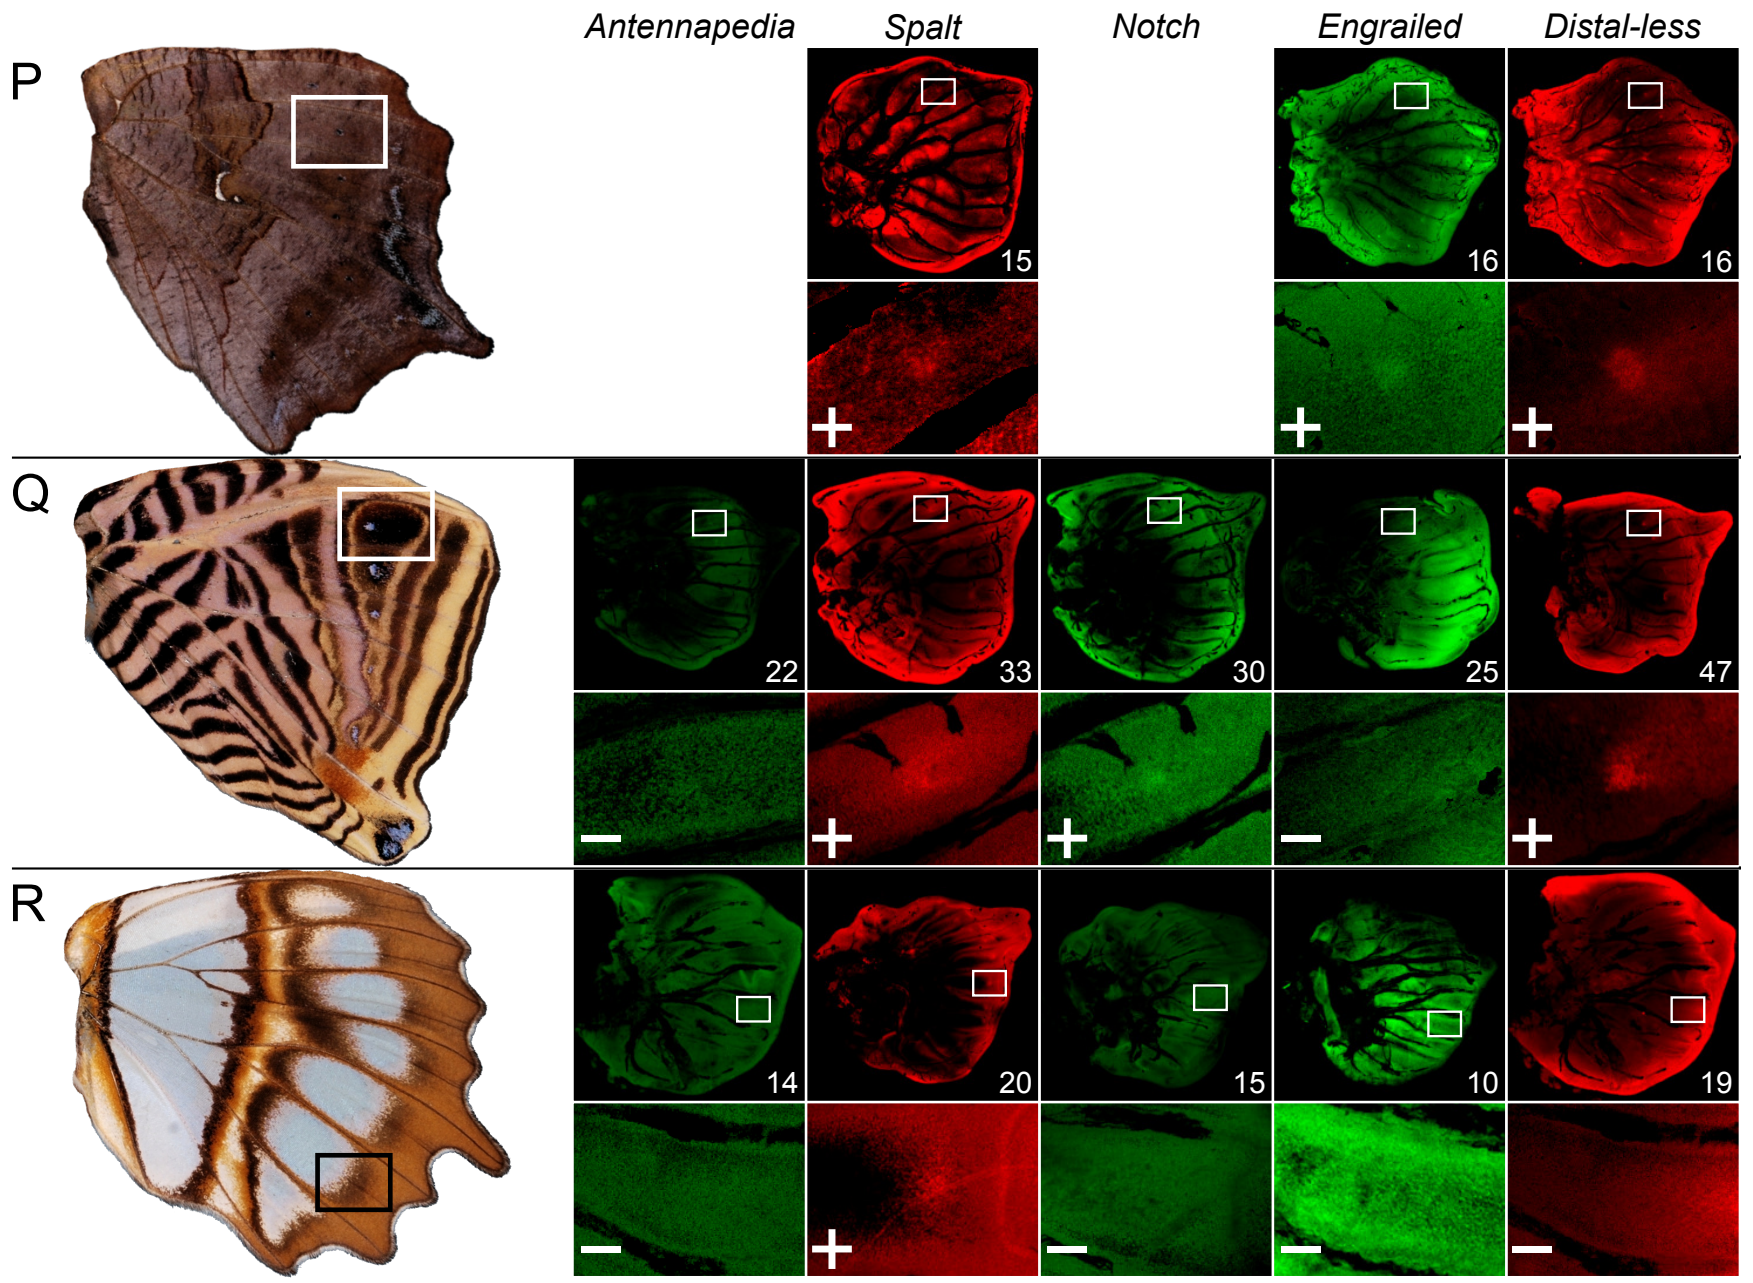

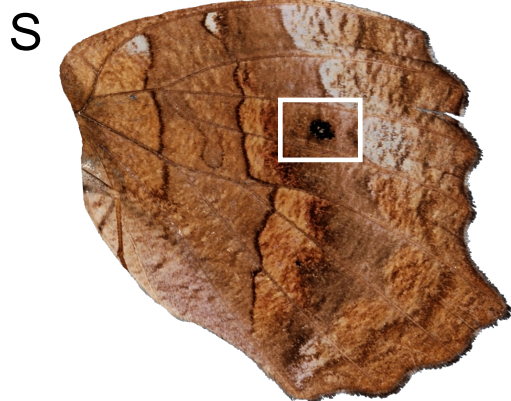

*Antennapedia*

*Spalt*

*Notch*

*Engrailed*

*Distal-less*

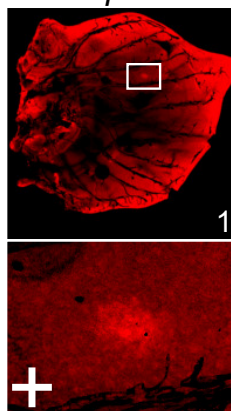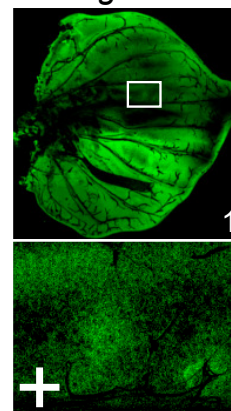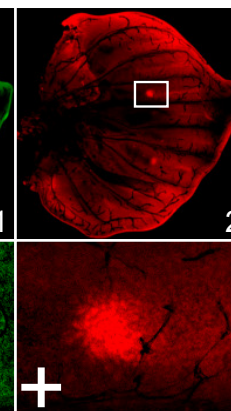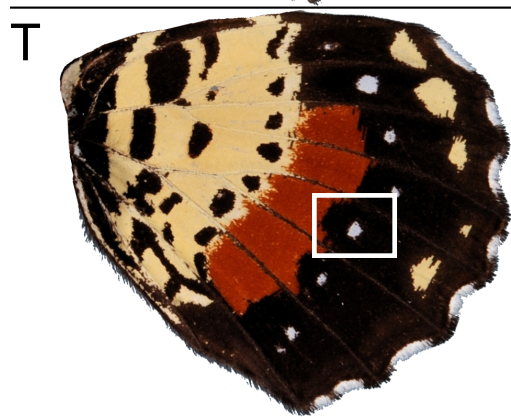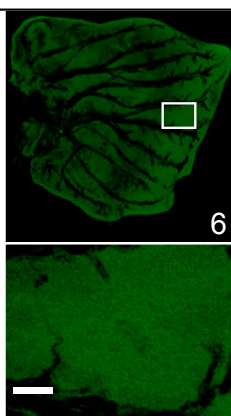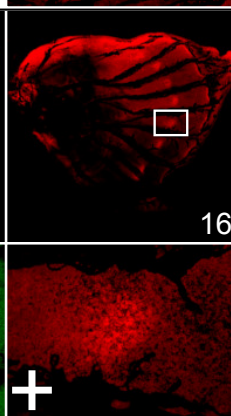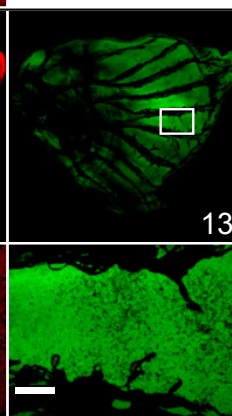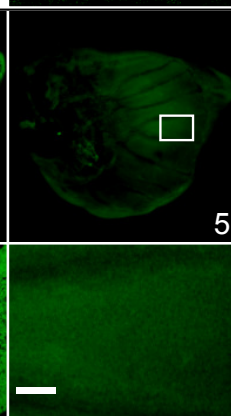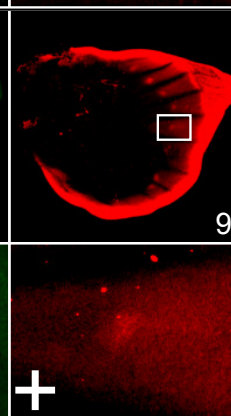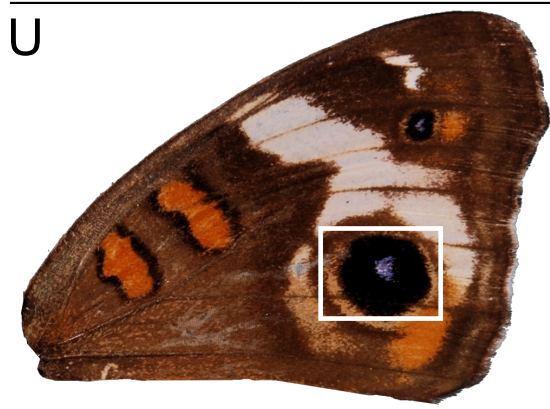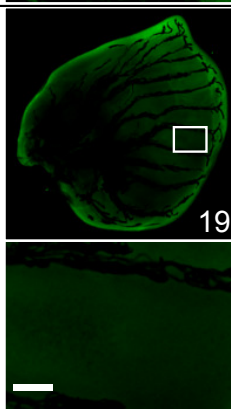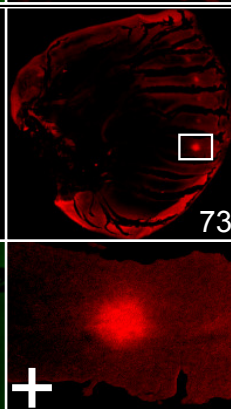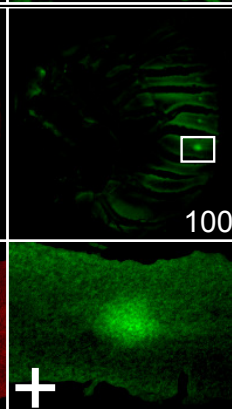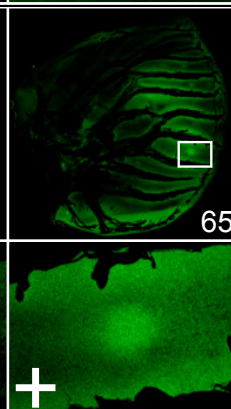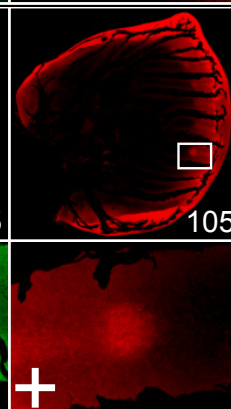



V

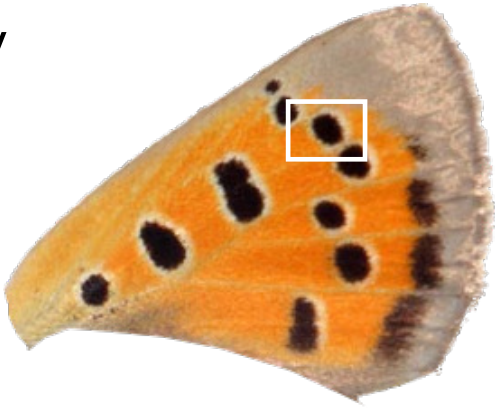

*Antennapedia*

*Spalt*

*Notch*

*Engrailed*

*Distal-less*

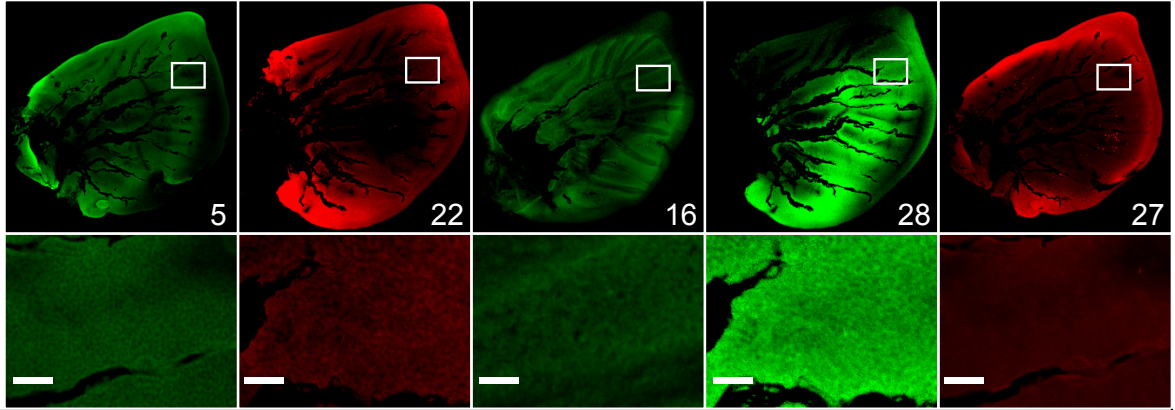

W

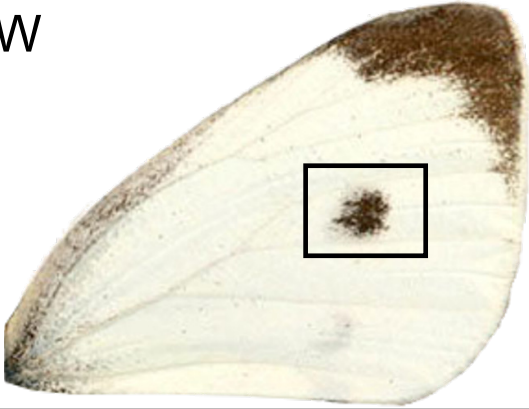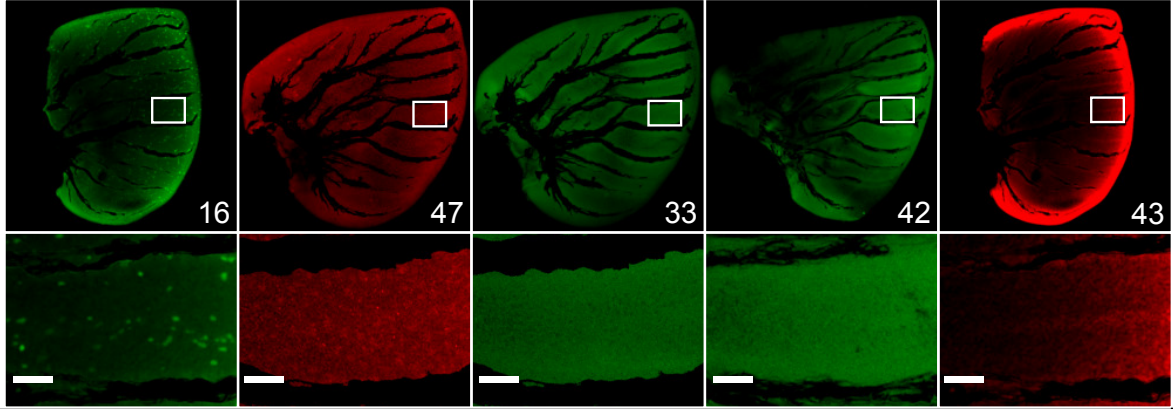

X

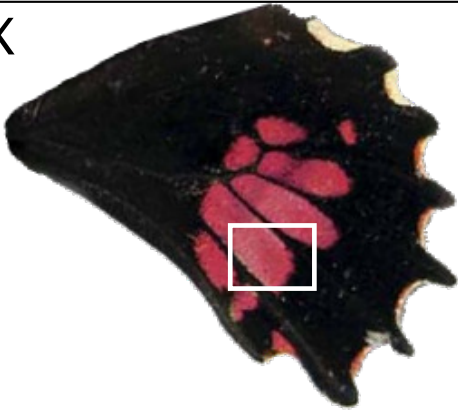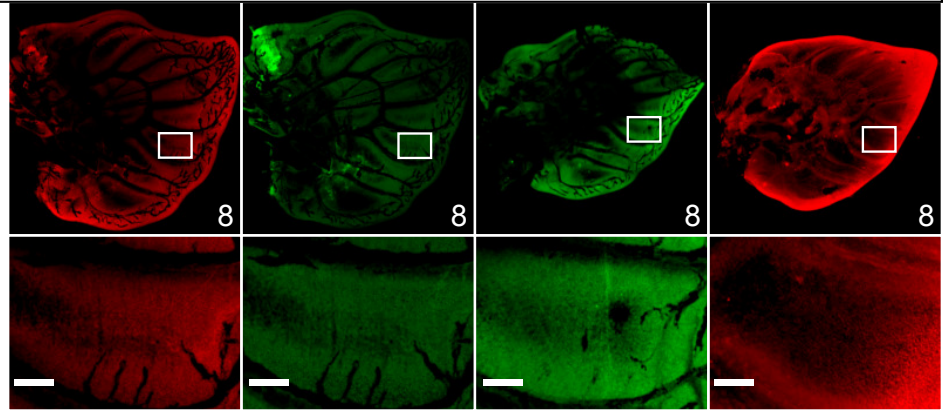

Supplement: pgen.1002893.s002.pdf [file pgen.1002893.s002.pdf]
