# Supplementary material for: A Single Origin for Nymphalid Butterfly Eyespots Followed by Widespread Loss of Associated Gene Expression
Source: PubMed Central journal article supplement (PMC3420954; doi:10.1371/journal.pgen.1002893), 2012-08-16

**Figure S4. Co-stains showing temporal differences in expression of pairs of genes in the eyespot centers.** (A-C) *Antp* before *sal*; (D-E) *Antp* before *dll*; (F-I) *sal* before *Notch*; (J) *sal* before *en*; (K-L) *sal* before *Dll*; (M-N) *Notch* before *Dll*; and (O-P) *en* before *Dll*.

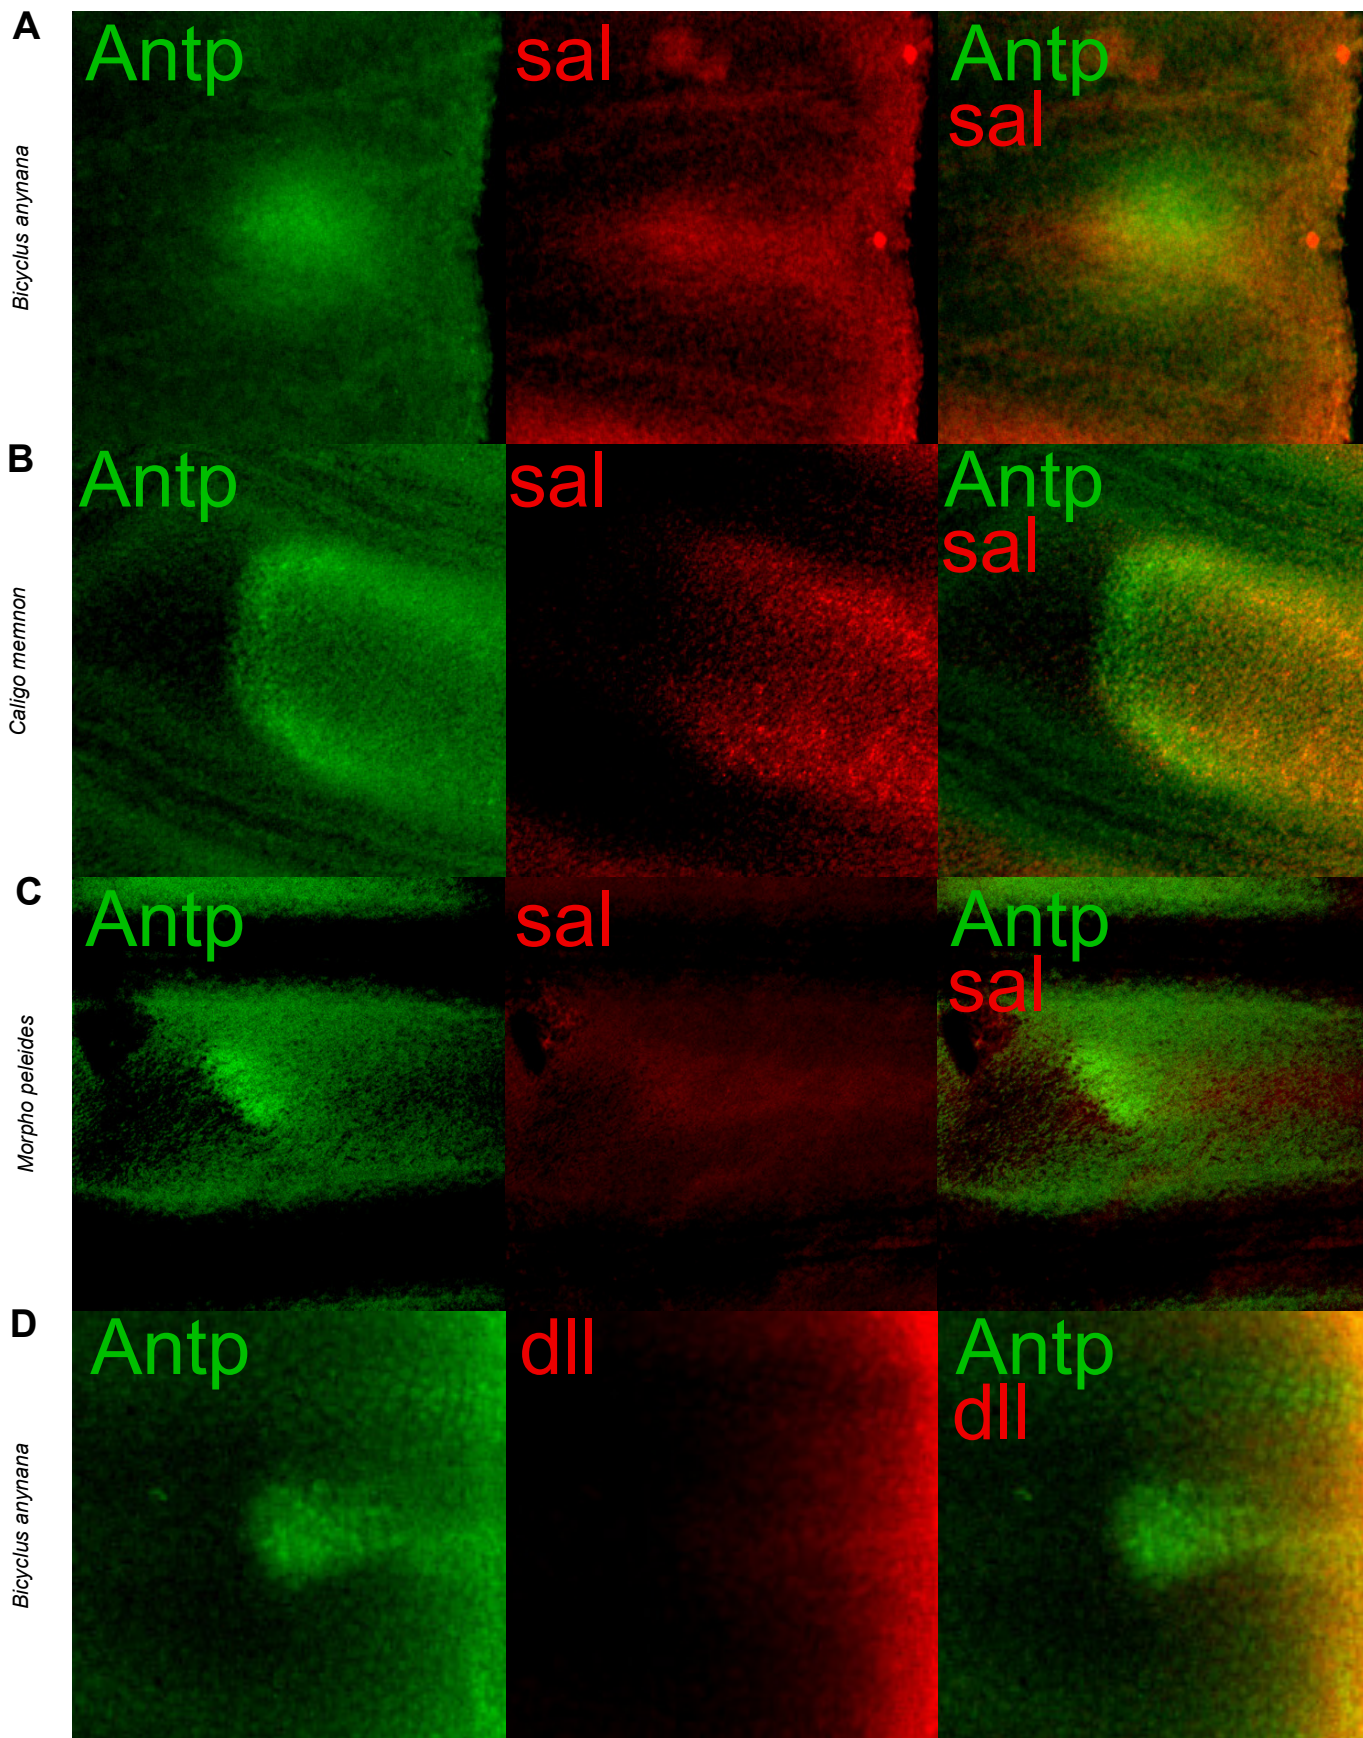



**E***Hamadryas amphinome*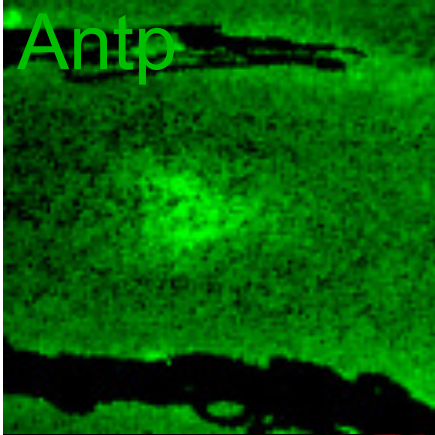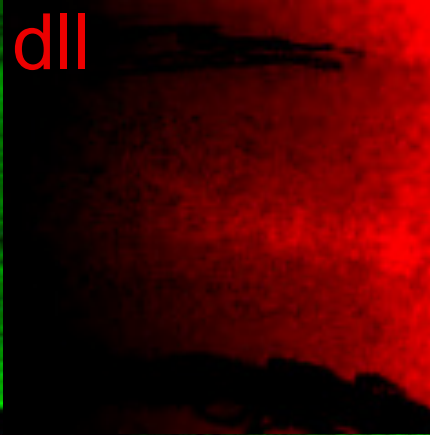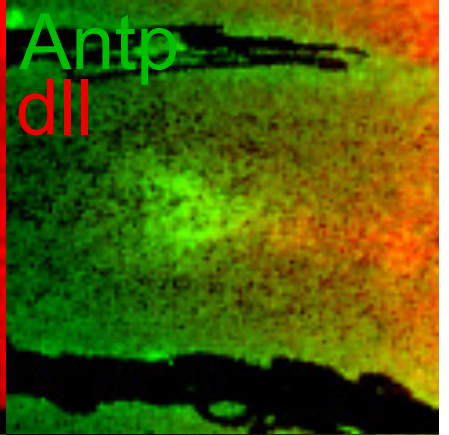**F***Bicyclus anynana*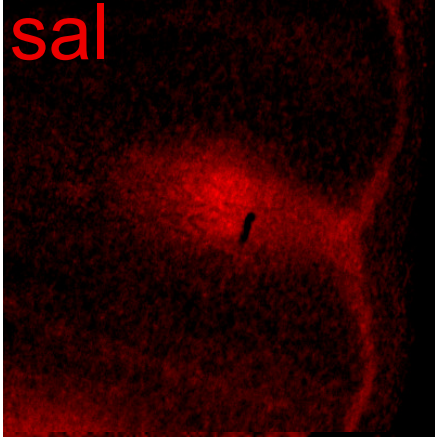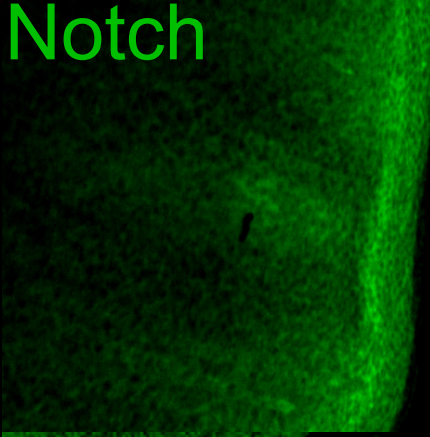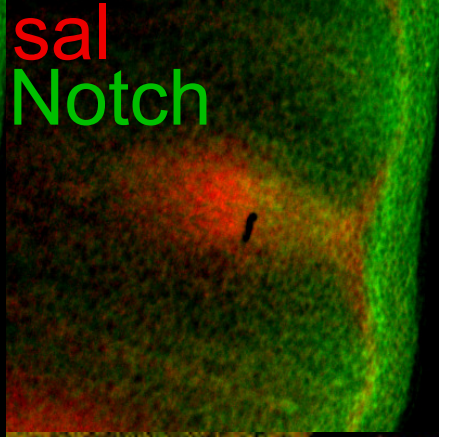**G***Hamadryas amphinome*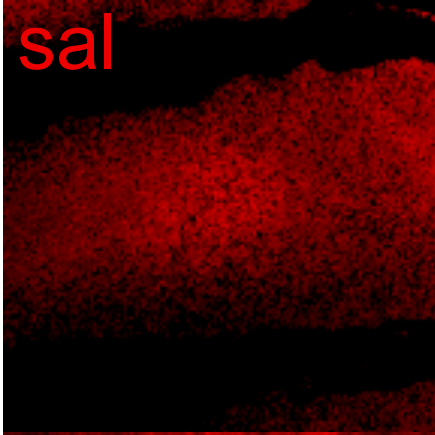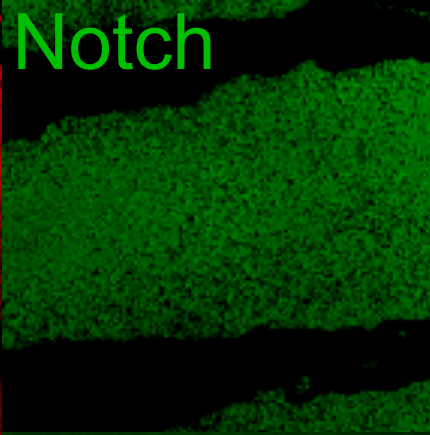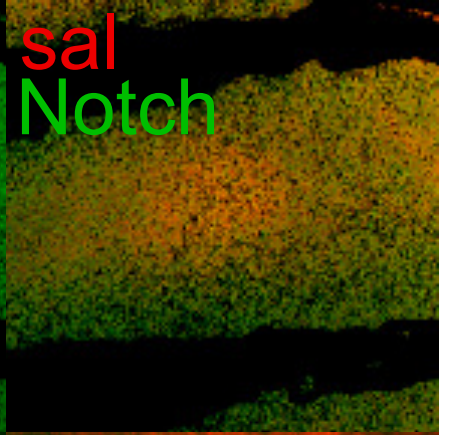**H***Vanessa cardui*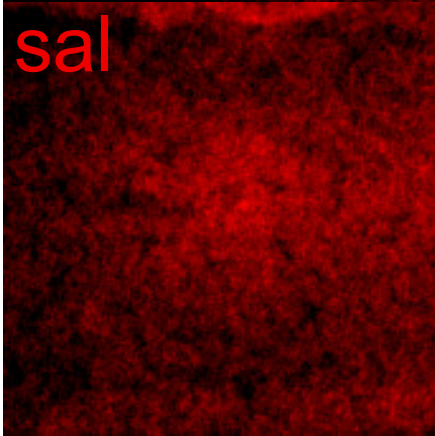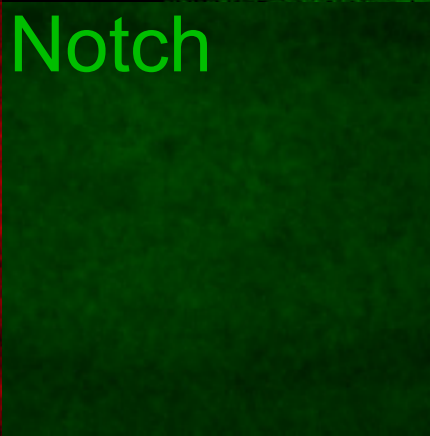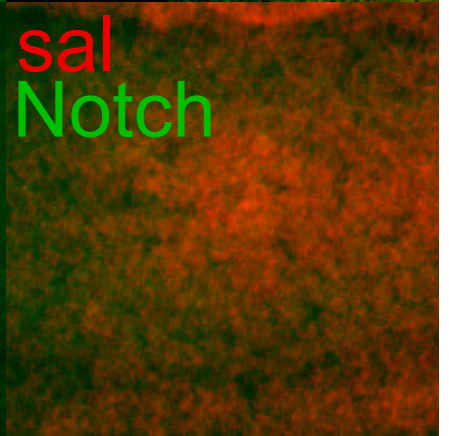

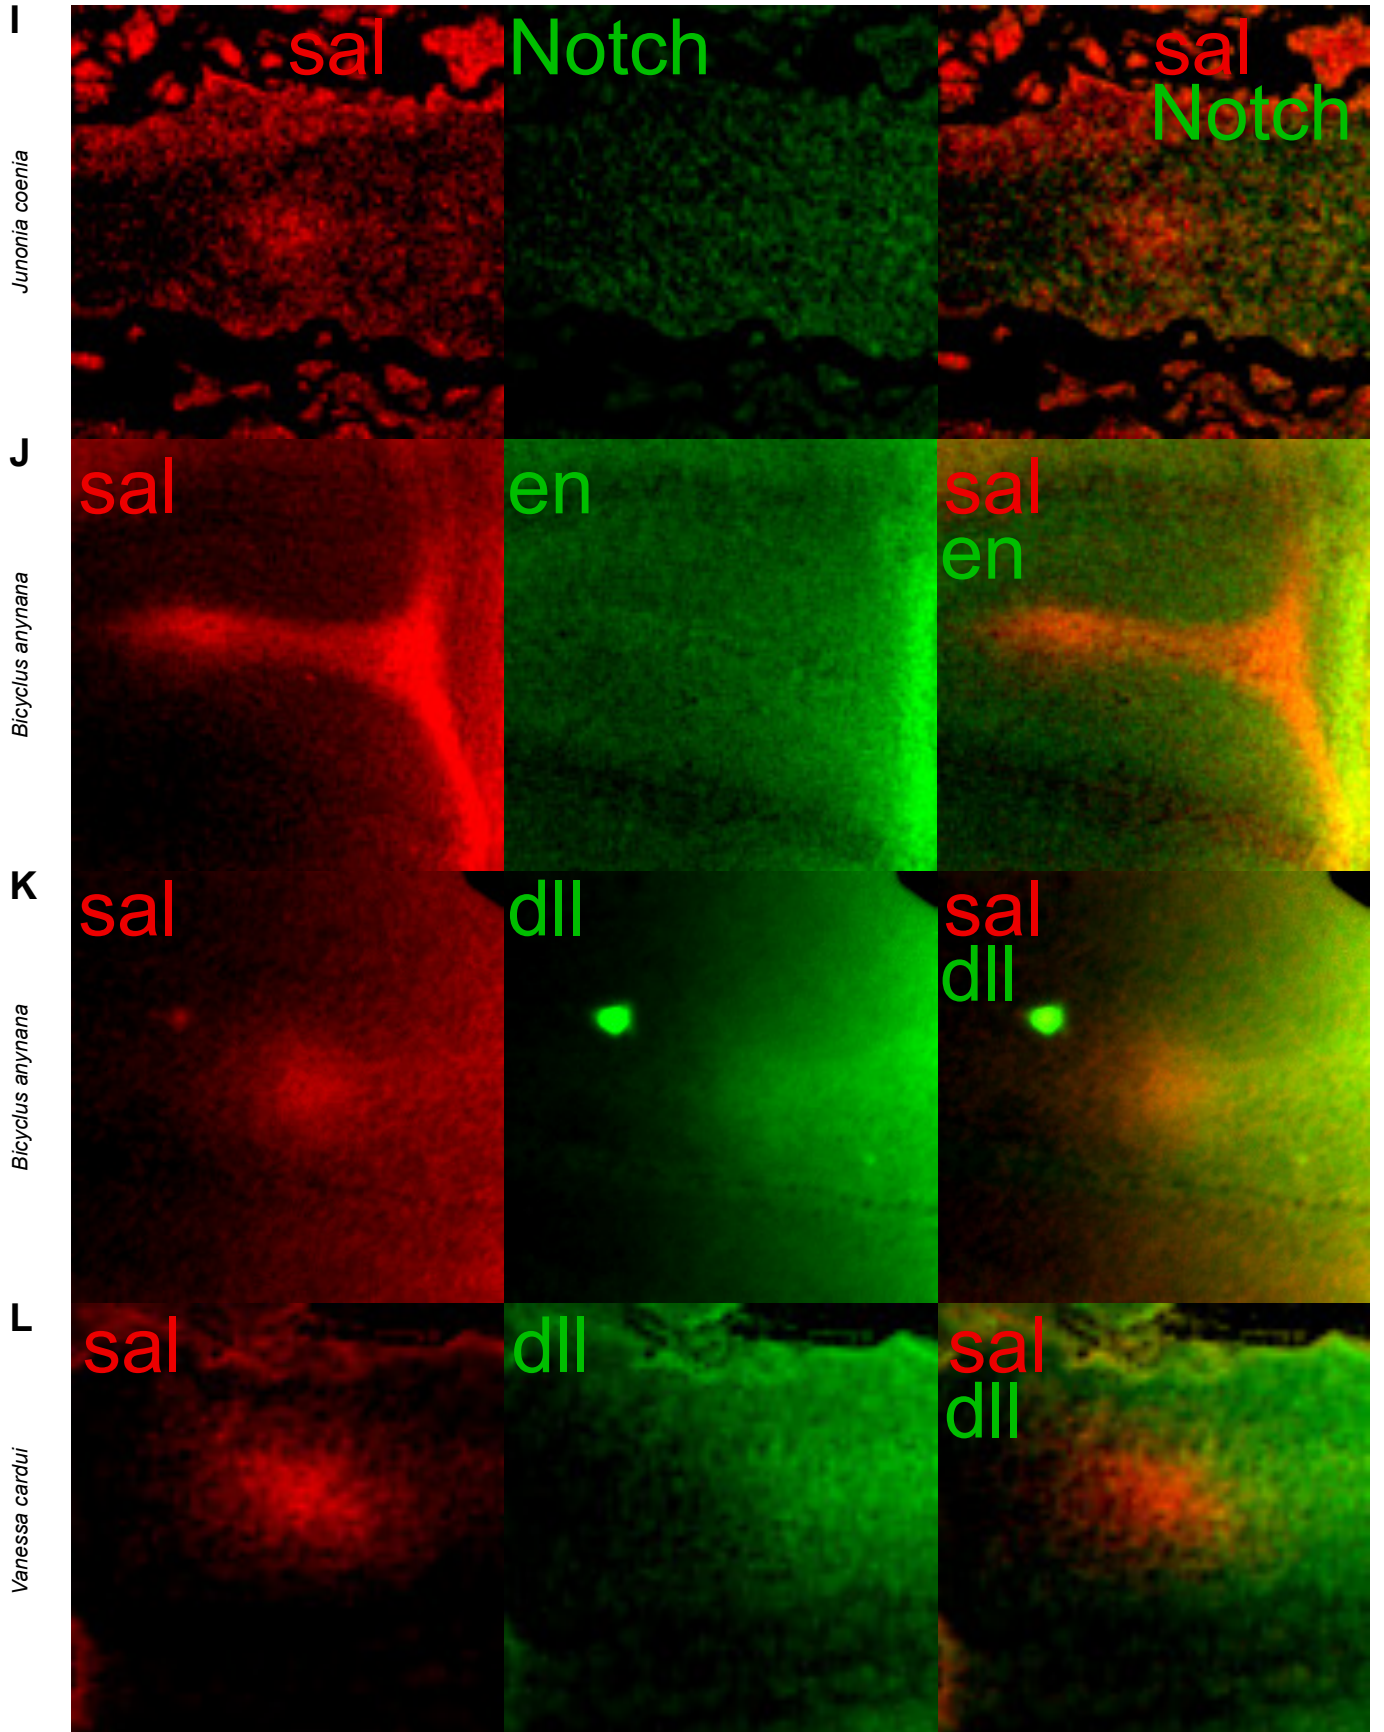



M

*Bicyclus anynana*

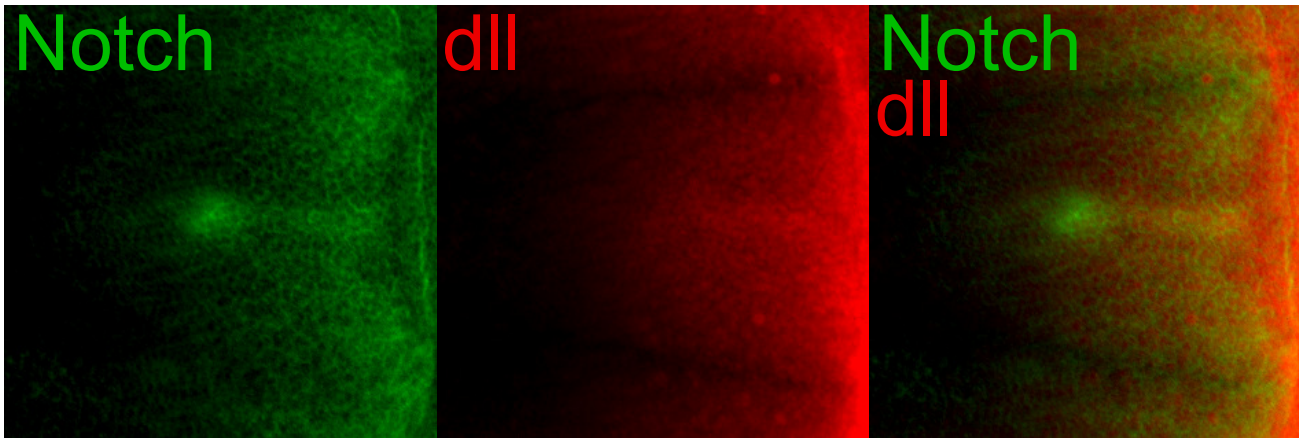

N

*Vanessa cardui*

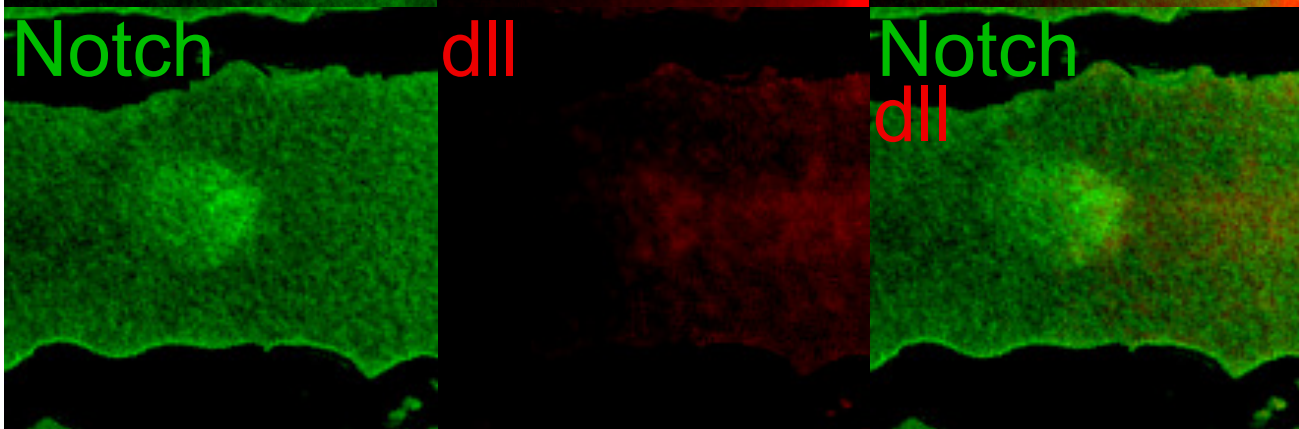

O

*Bicyclus anynana*

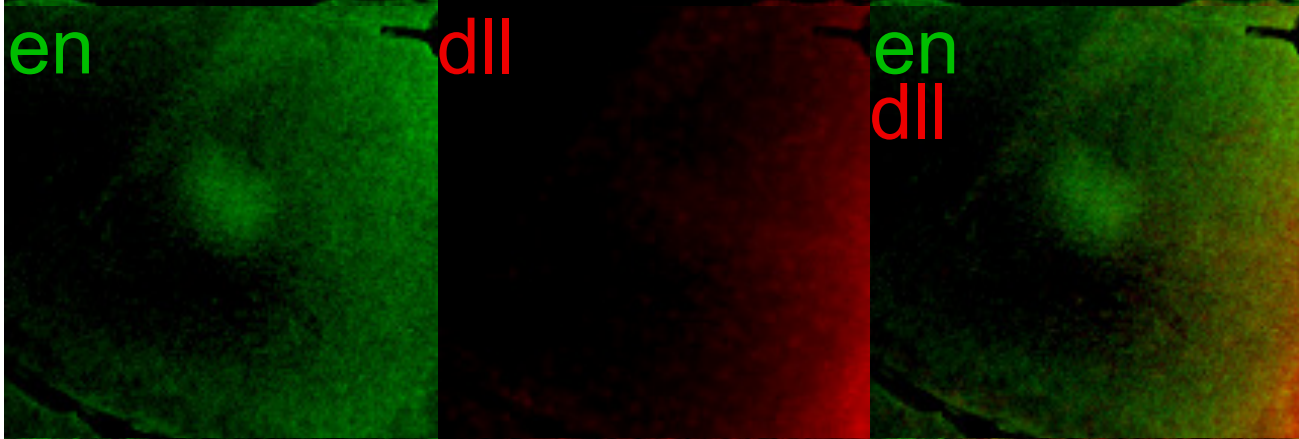

P

*Vanessa virginicensis*

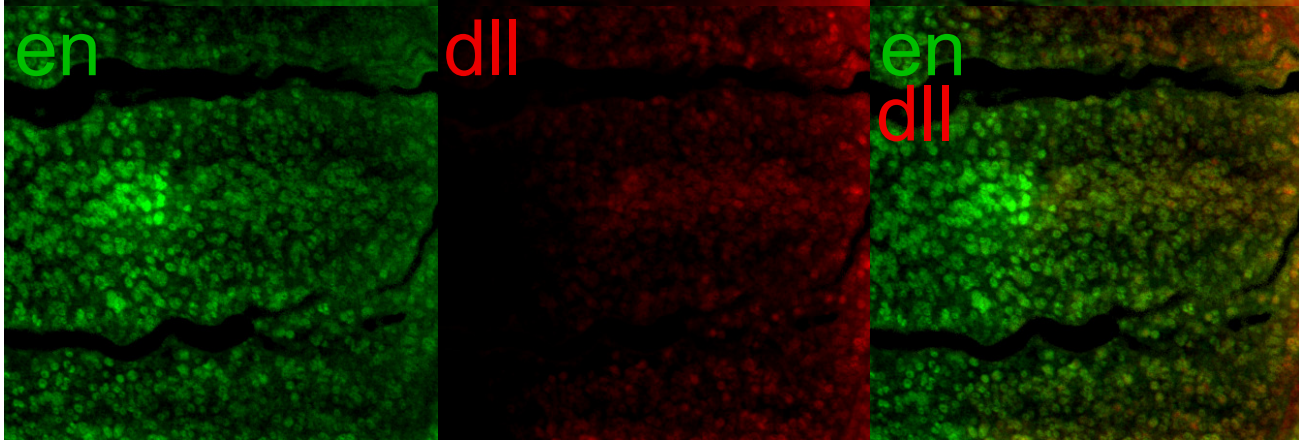

Supplement: pgen.1002893.s005.pdf [file pgen.1002893.s005.pdf]
