# Supplementary material for: A Single Origin for Nymphalid Butterfly Eyespots Followed by Widespread Loss of Associated Gene Expression
Source: PubMed Central journal article supplement (PMC3420954; doi:10.1371/journal.pgen.1002893), 2012-08-16
Supplement: pgen.1002893.s003.pdf [file pgen.1002893.s003.pdf]

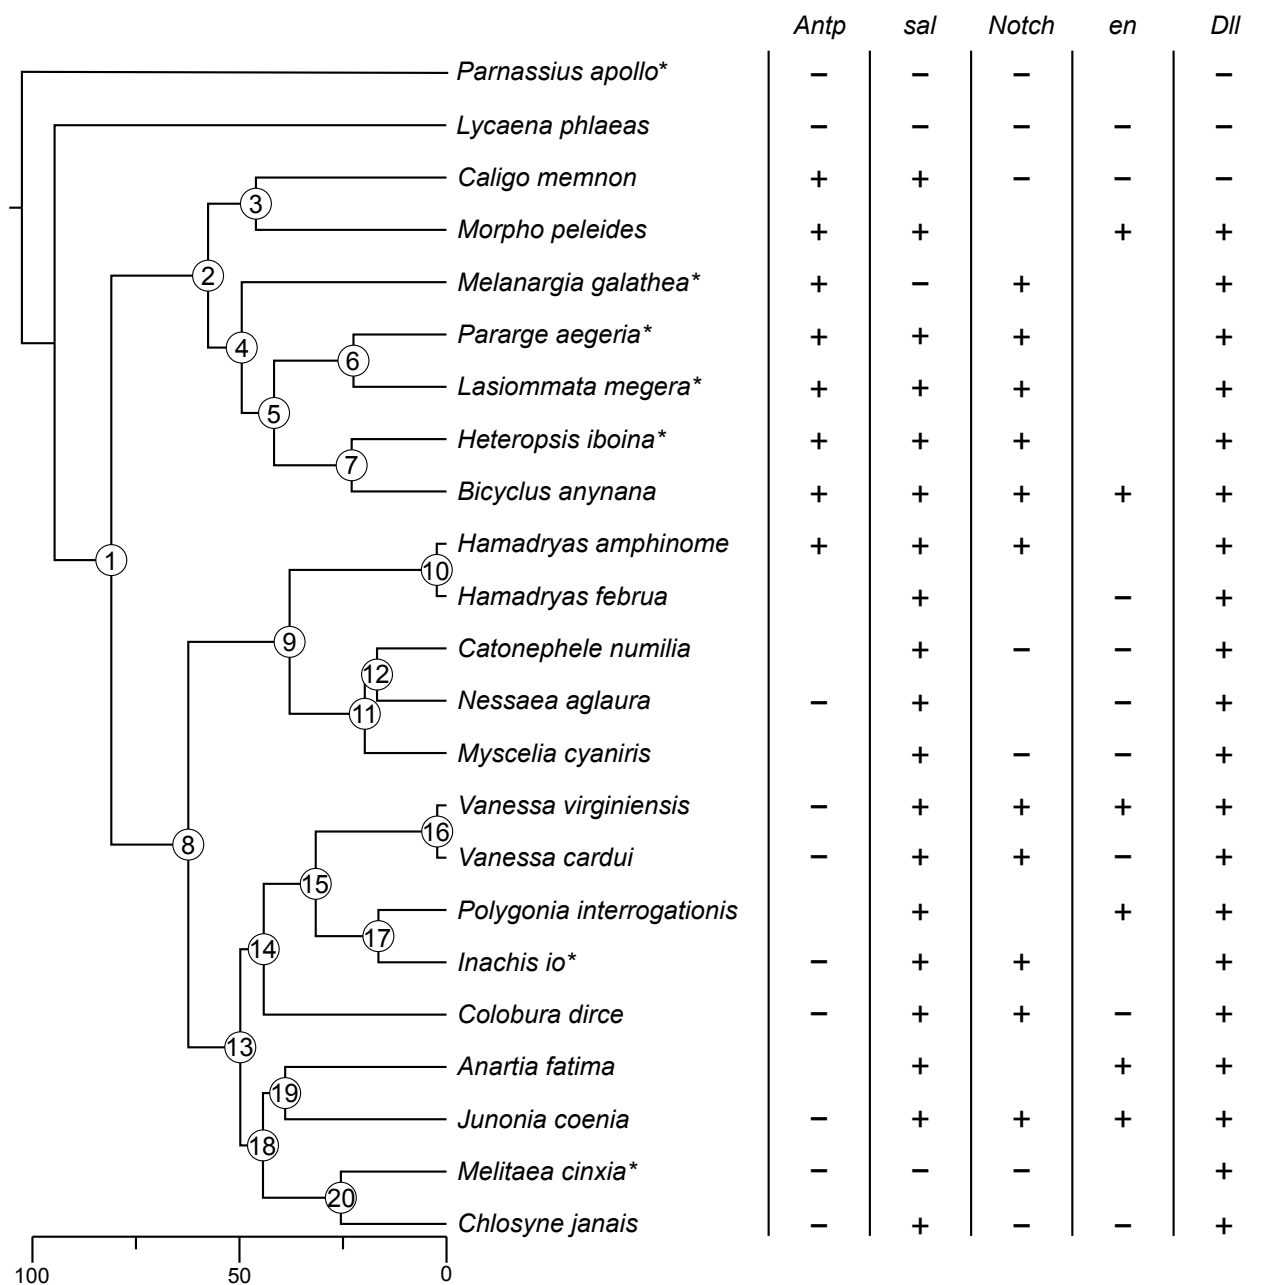

**Figure S3. Relationships among taxa used for inferring history of gene expression in future eyespot centers.** Divergence times (in millions of years) within Nymphalidae from [13] and divergence times among families from [14]. Numbers at nodes indicate nodes used for fixing ancestral states in likelihood ratio tests (see Table S3). Expression for each gene indicated as: (-) no central expression, (+) central expression; taxon/gene combinations missing symbols indicate data not available. Asterisks (\*) indicate species for which expression data are from [7,8].
