# Supplementary material for: A Single Origin for Nymphalid Butterfly Eyespots Followed by Widespread Loss of Associated Gene Expression
Source: PubMed Central journal article supplement (PMC3420954; doi:10.1371/journal.pgen.1002893), 2012-08-16
Supplement: pgen.1002893.s004.pdf [file pgen.1002893.s004.pdf]

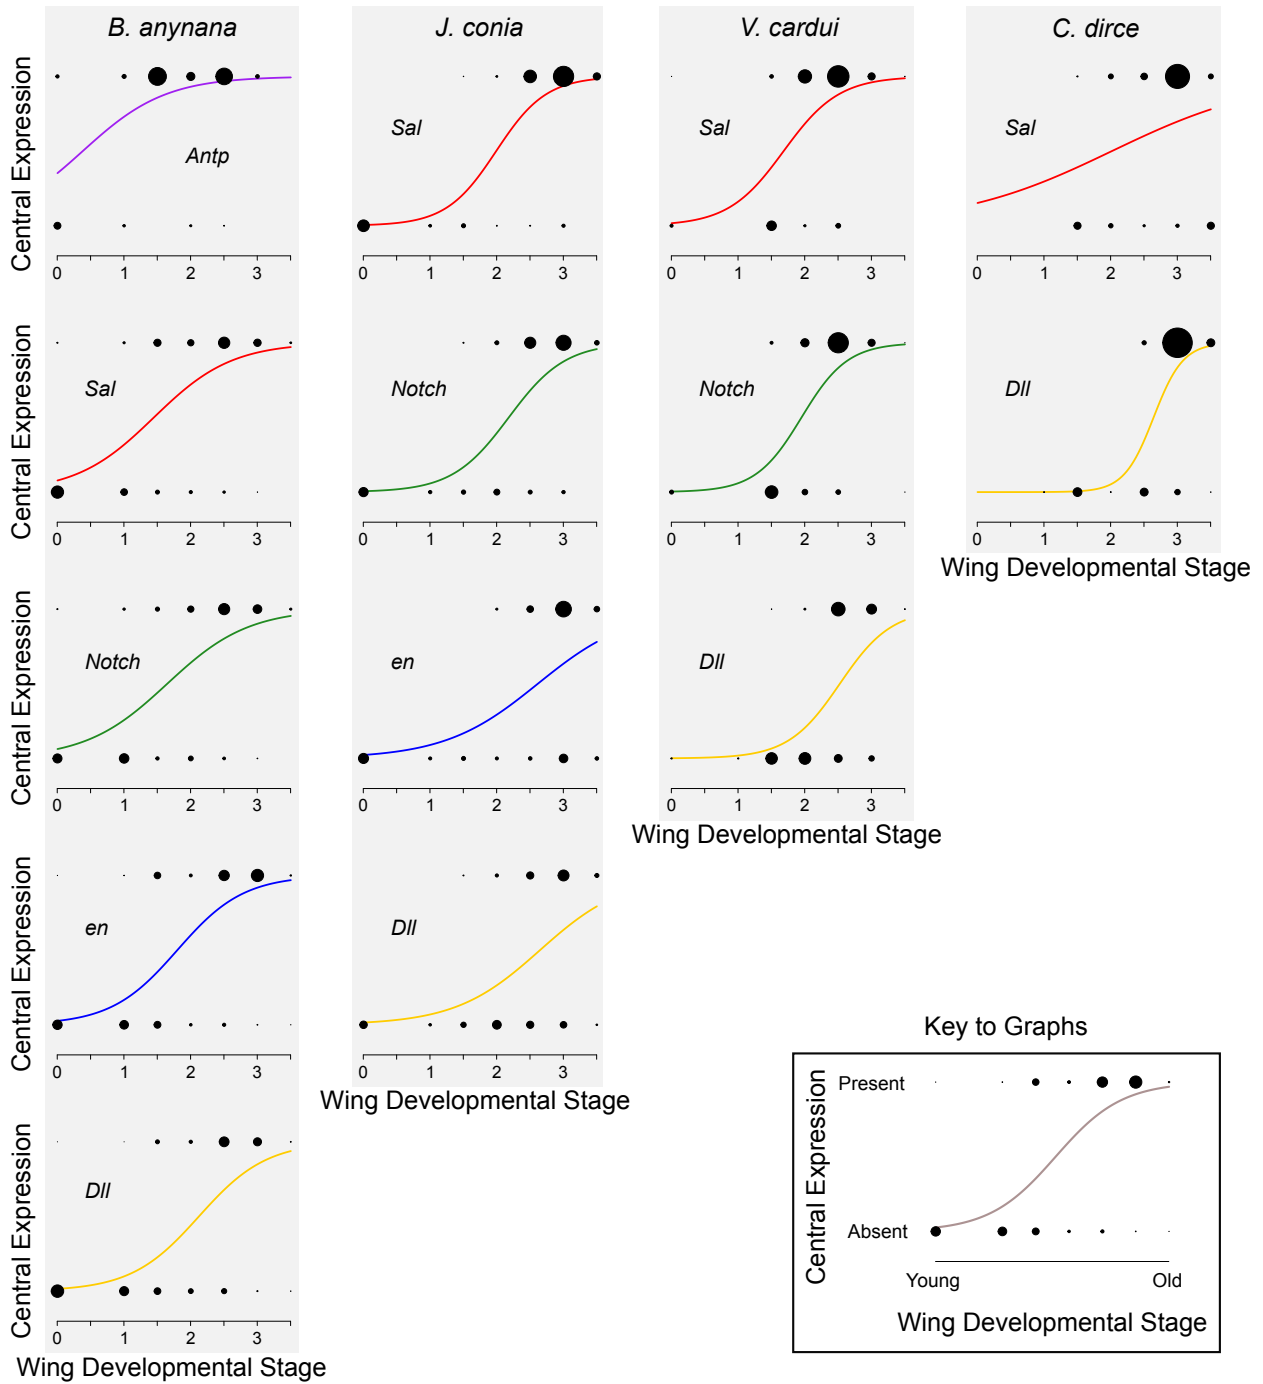

**Figure S5. Temporal dynamics of gene expression in future eyespot centers of four nymphalid species.** Graphs show the relationship between wing developmental stage and eyespot central expression (present vs. absent). Lines show best-fit logistic curves for each gene and sizes of points indicate relative number of samples observed at each developmental stage. See Figure S6 for central expression category examples.
