# Supplementary material for: A Single Origin for Nymphalid Butterfly Eyespots Followed by Widespread Loss of Associated Gene Expression
Source: PubMed Central journal article supplement (PMC3420954; doi:10.1371/journal.pgen.1002893), 2012-08-16
Supplement: pgen.1002893.s006.pdf [file pgen.1002893.s006.pdf]

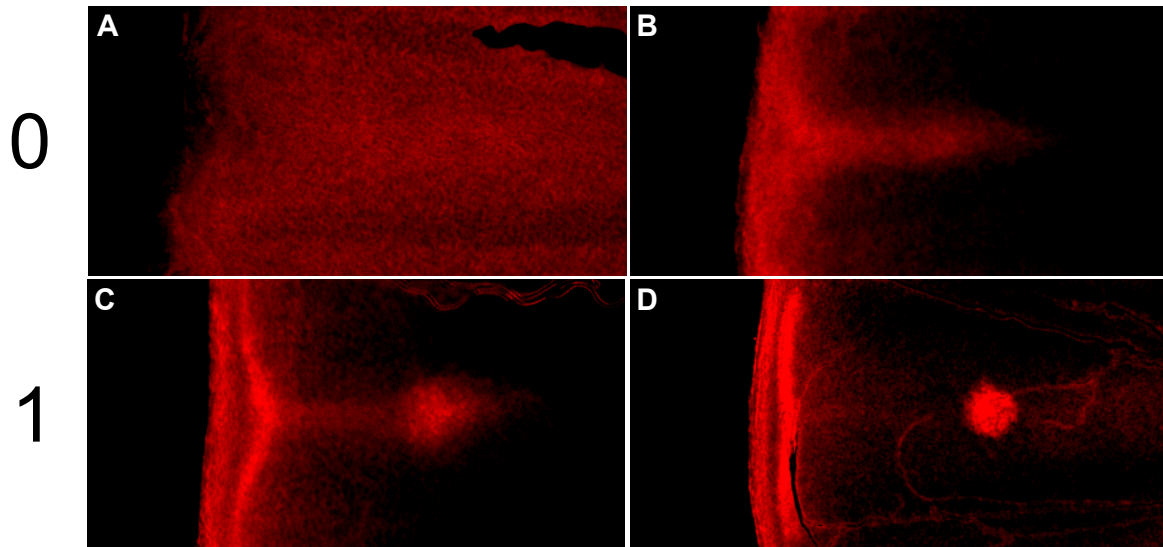

**Figure S6. Focal expression categories for temporal expression analyses.** Images show anti-*Sal* antibody stains in the Cu<sub>1</sub> compartment of *B. anynana* hindwings. Gene expression was categorized as zero (central expression absent) when no pattern of up-regulation was evident (A) or when expression was only detected in the midvein area (B). Gene expression was categorized as one (central expression present), when a clear cluster of central cells was detected, either in the presence (C) or absence (D) of expression in the midvein area.
